# Supplementary material for: Deletion of the Stress Response Gene DDR48 from Histoplasma capsulatum Increases Sensitivity to Oxidative Stress, Increases Susceptibility to Antifungals, and Decreases Fitness in Macrophages
Source: MDPI journal article supplement (doi:10.3390/jof7110981), 2021-11-18

# **Supplemental – Figures/Tables**

**jof-1437875 – Blancett et. Al.**

## Supplemental Figure S1

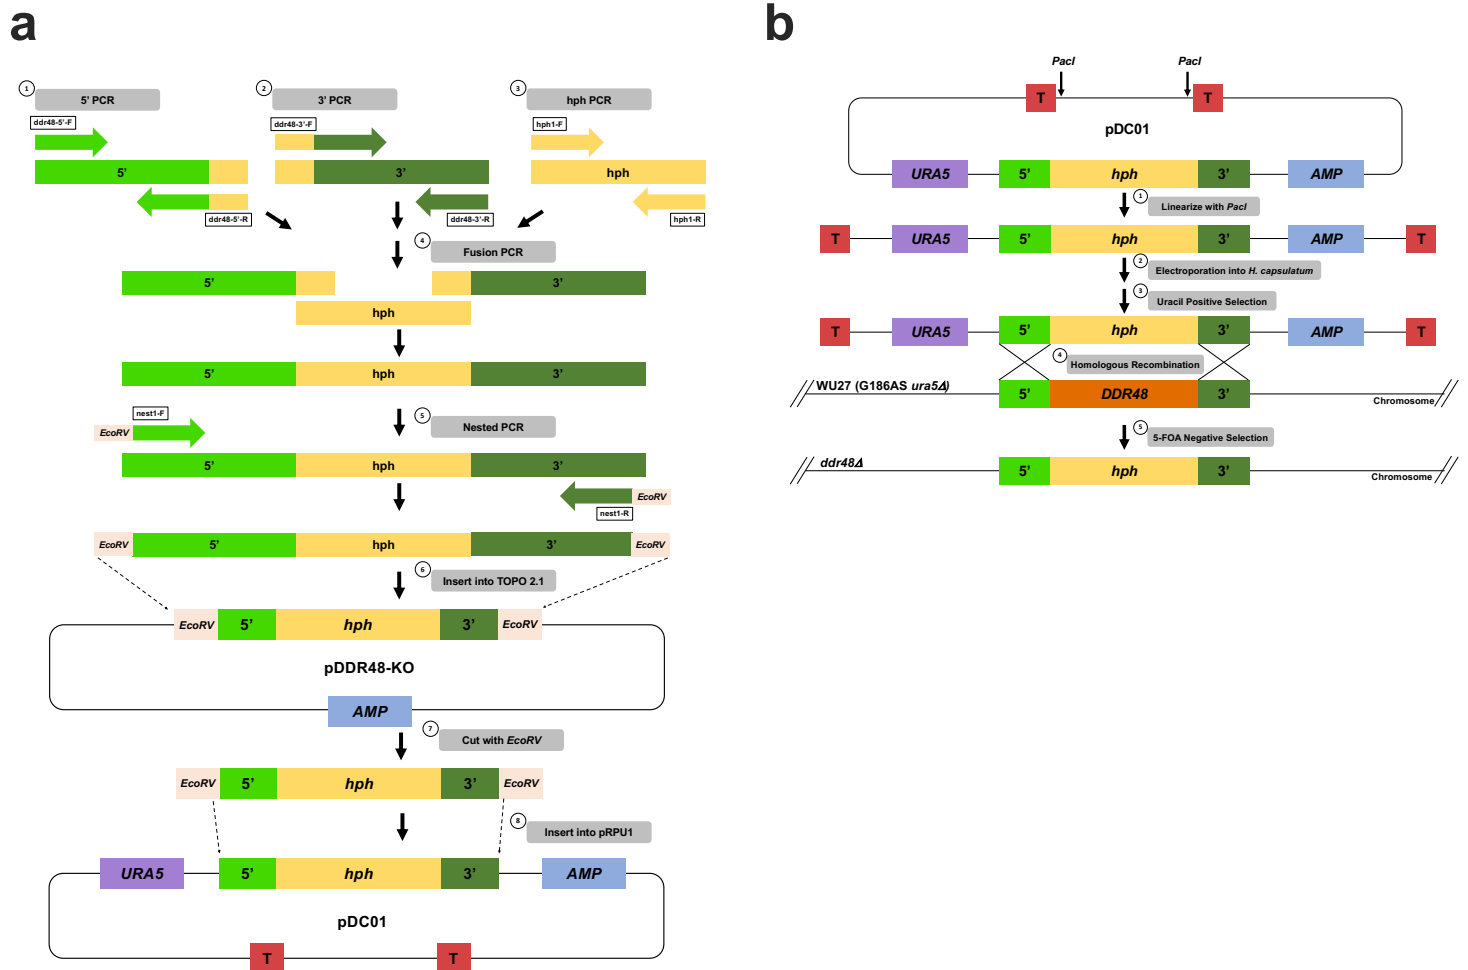

**Sup. Fig. S1. Deletion, complementation, and confirmation of *HcDDR48*.** **a.** Schematic diagram of PCRs to generate the *ddr48*Δ recombinant substrate. **b.** Schematic diagram of the plasmid features and steps performed for generation of the *H. capsulatum ddr48*Δ strain. T, telomere; URA5, orotidine monophosphate pyrophosphorylase; 5', 1000 bp upstream of *DDR48* CDS, *hph*, hygromycin phosphotransferase, AMP, ampicillin resistance; 3', 1000 bp downstream of *DDR48* CDS.

## Supplemental Figure S2

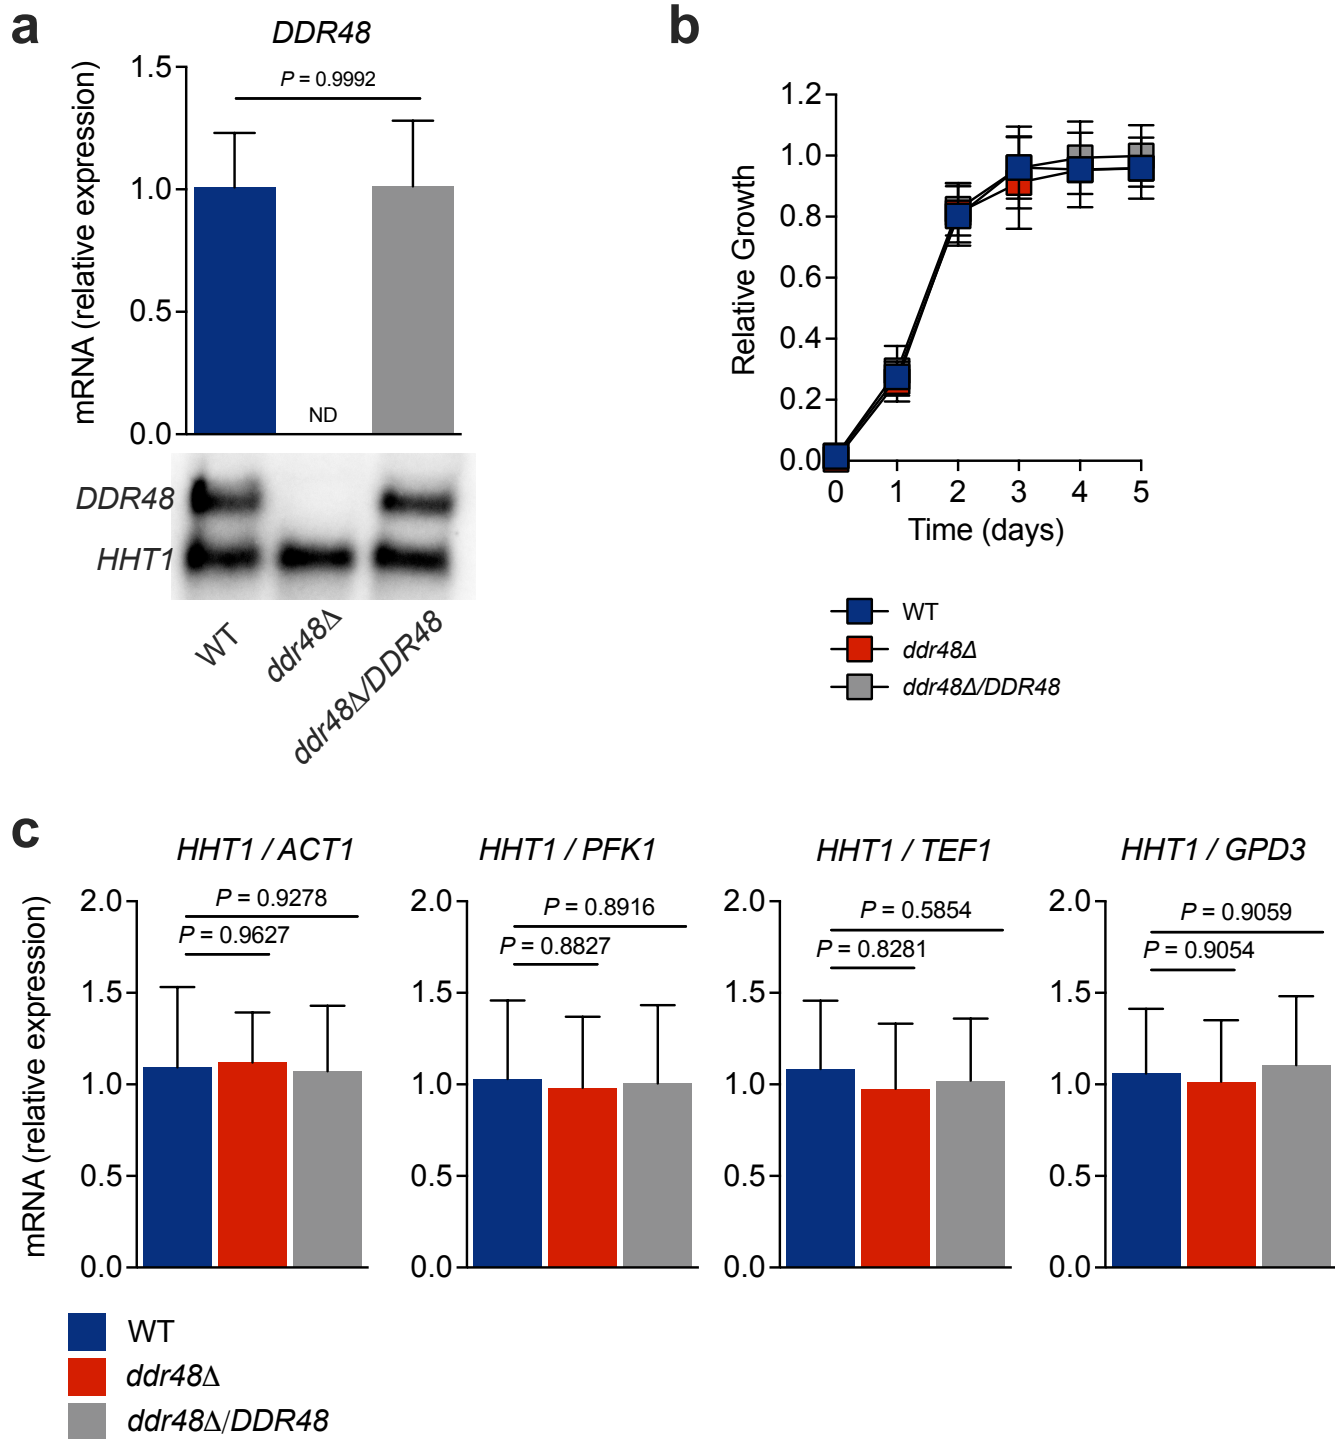

**Sup. Fig. S2. Confirmation of *ddr48Δ*, growth characteristics, and qRT-PCR controls.** **a.** *DDR48* mRNA levels were measured (n=6) in wildtype (*DDR48*(+)), *ddr48Δ*, and *ddr48Δ/DDR48* strains by qRT-PCR and calculated relative to *HHT1* levels. ND = no transcripts detected. **b.** Relative growth (OD 600 nm) of WT, *ddr48Δ*, and *ddr48Δ/DDR48* yeasts in HMM. **c.** Expression of *HHT1* relative to *ACT1*, *PFK1*, *TEF1*, and *GPD3*, measured by qRT-PCR (n = 12). Data is represented as mean  $\pm$  standard deviation (SD). Statistical analyses were performed using 1-way ANOVA.

## Supplemental Figure S3

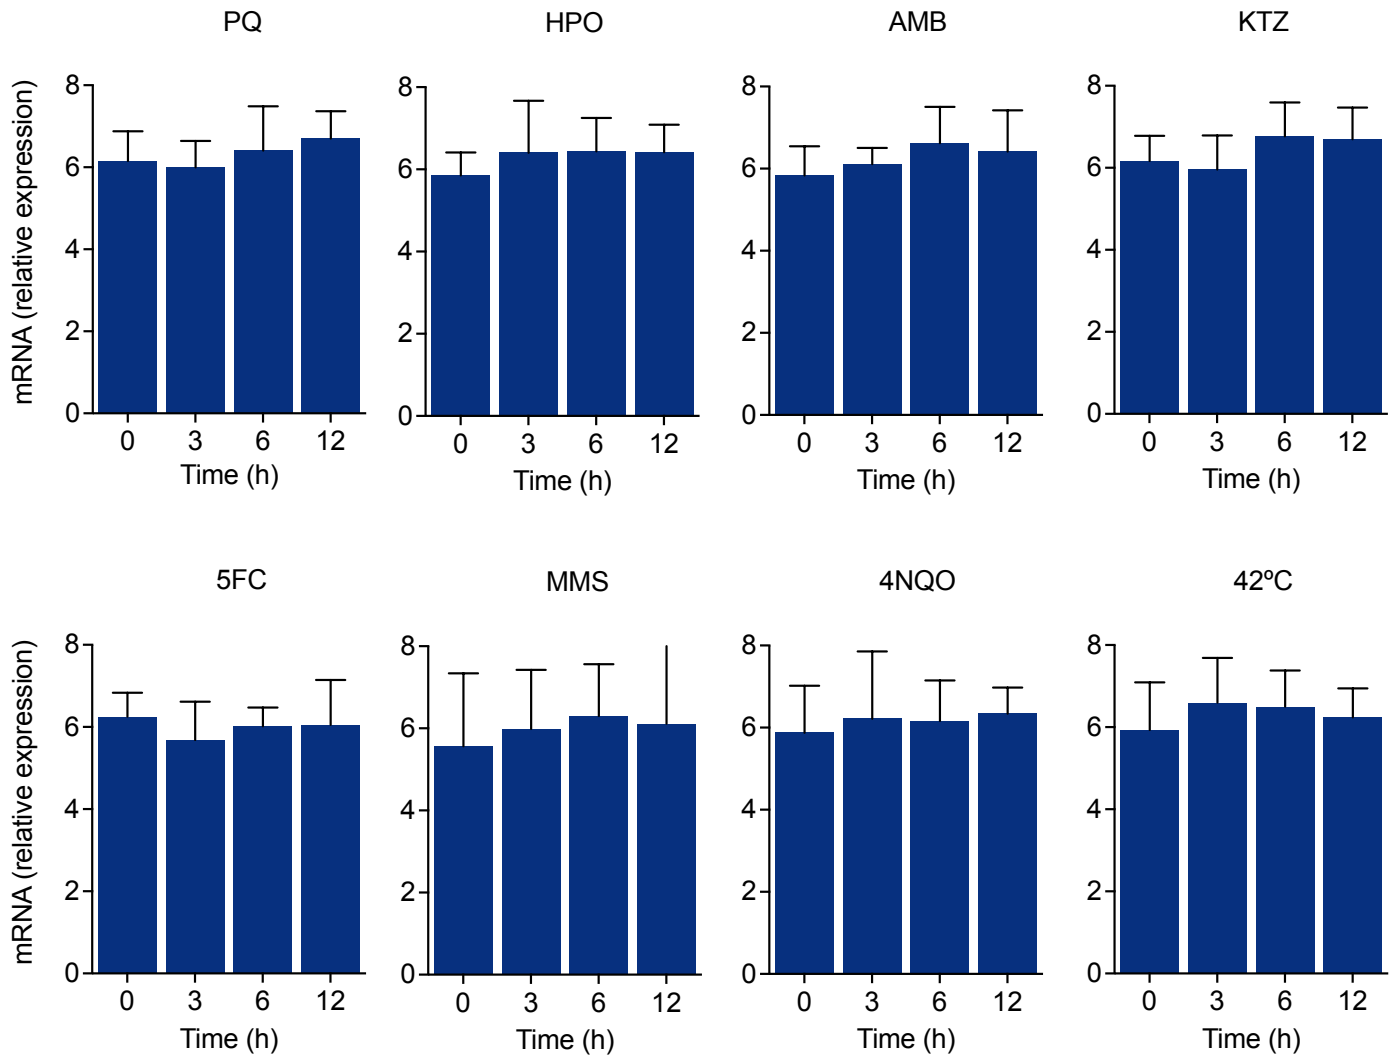

**Supp. Fig. S3. *DDR48* transcript levels are constitutive in *Histoplasma mycelia* subjected to cellular stressors.** Expression of *DDR48* in mycelia growth phase measured by qRT-PCR (n=9) at 0, 3, 6, and 12 hours after the addition of various cellular stressors. The stressors include 0.1  $\mu$ M paraquat (PQ); superoxide anions, 2.5 mM hydrogen peroxide (HPO); peroxides, 0.1  $\mu$ g/ml amphotericin-B (AMB); membrane disruption, 0.25  $\mu$ g/ml ketoconazole (KTZ); sterol synthesis inhibition, 50  $\mu$ g/ml 5-fluorocytosine (5FC); DNA/RNA biosynthesis inhibition, 1 mM methyl methanesulfonate (MMS); DNA damage-methylating agent, 0.25  $\mu$ M 4-nitroquinoline-1-oxide (4NQO); UV-like damage, and heat-shock at 42°C (HS). All data generated were performed on three technical replicates and at least two biological replicates. Data is represented as mean  $\pm$  standard deviation (SD). Statistical analyses were performed using 1-way ANOVA with Tukey's multiple comparisons test.

## Supplemental Figure S4

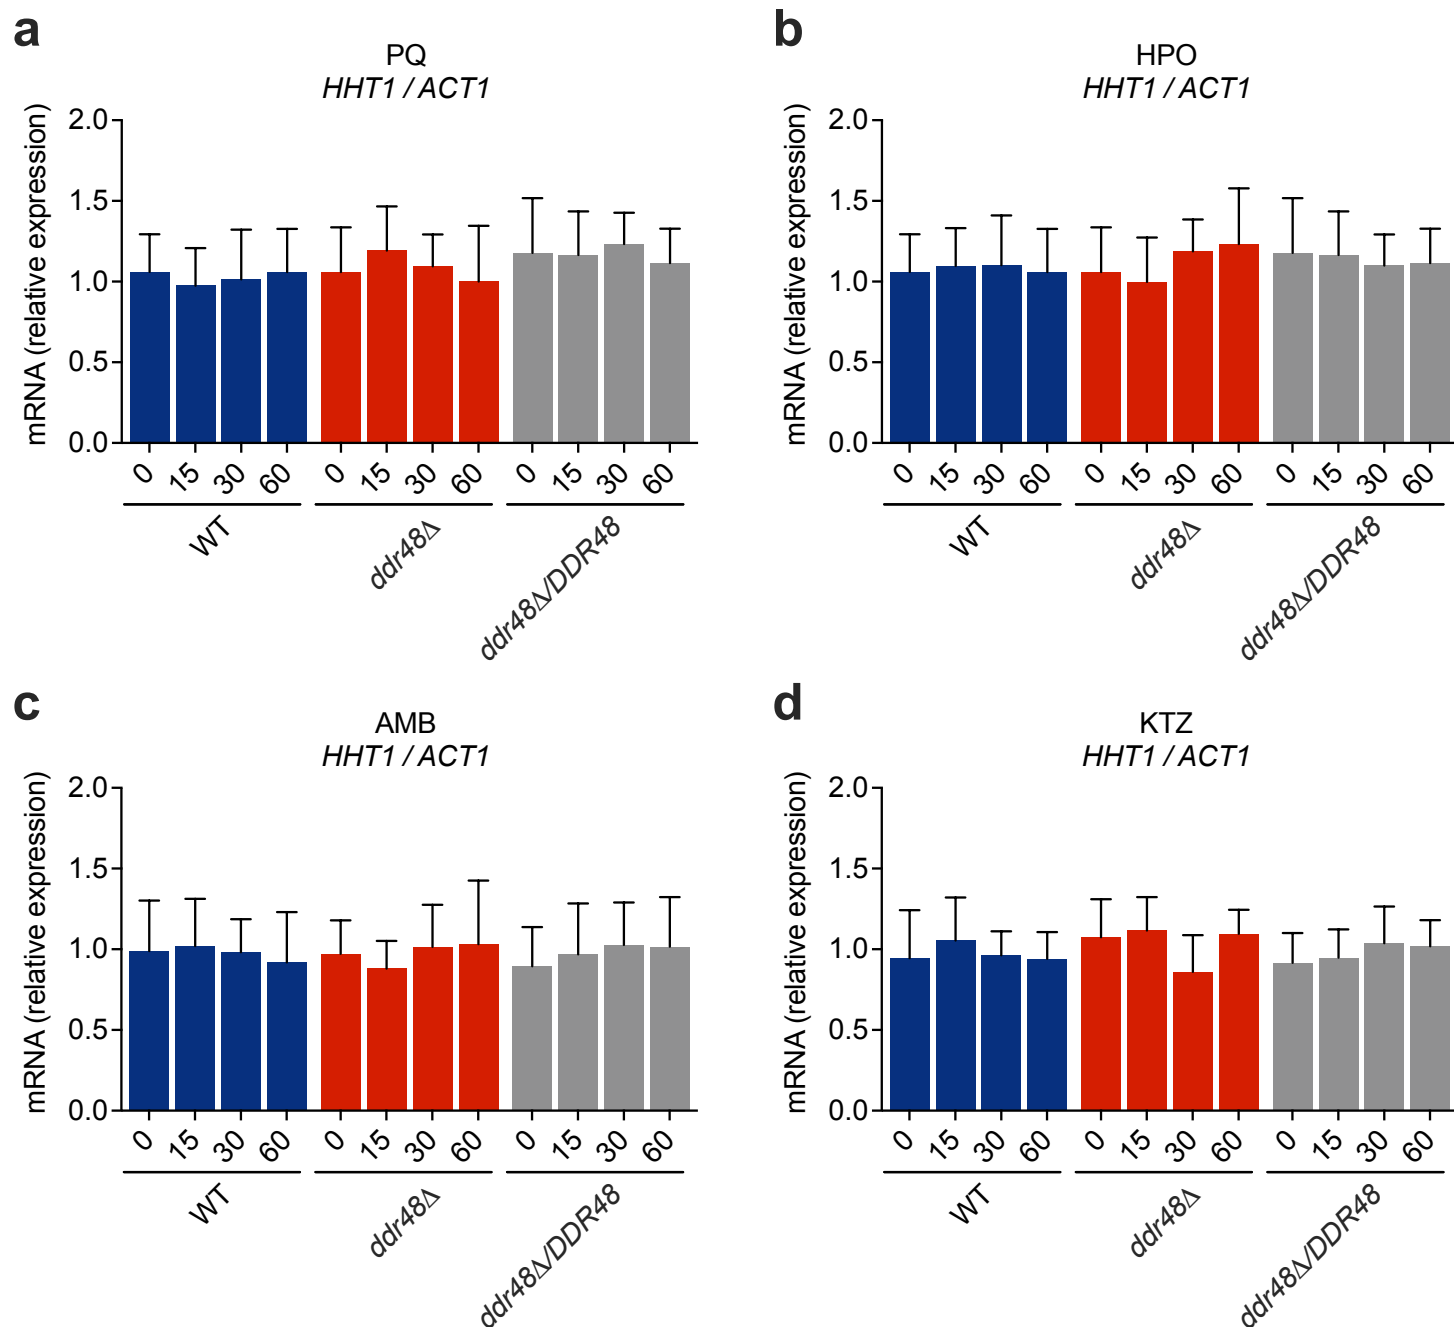

**Sup. Fig. S4. *HHT1* gene expression remains constant in WT, *ddr48Δ*, and *ddr48Δ/DDR48* yeasts after exposure to cellular stress.** Expression of *HHT1* measured by qRT-PCR (n=9) at 0, 15, 30, and 60 minutes post treatment with **a.** 0.1  $\mu$ M PQ, **b.** 2.5 mM HPO, **c.** 0.1  $\mu$ g/ml AMB, and **d.** 0.25  $\mu$ g/ml KTZ. All data generated were performed on three technical replicates and at least two biological replicates. Data is represented as mean  $\pm$  standard deviation (SD). Statistical analyses were performed using 1-way ANOVA with Tukey's multiple comparisons test.

## Supplemental Figure S5

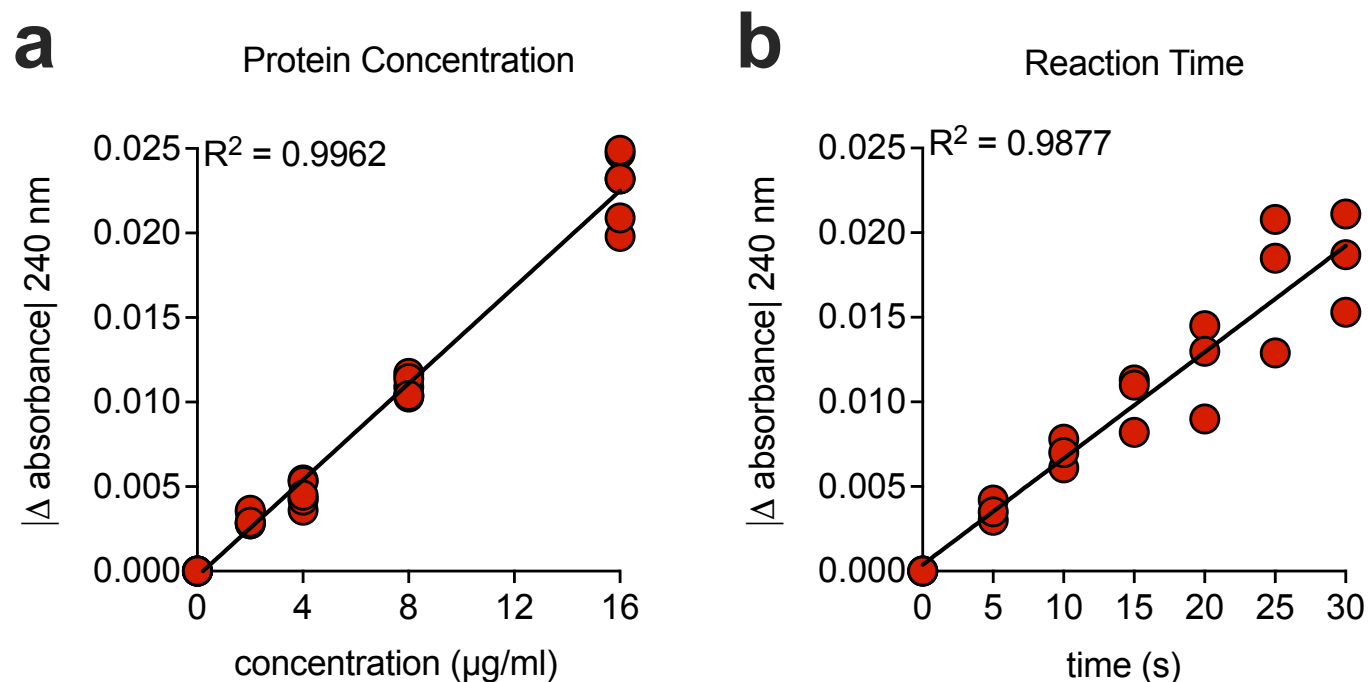

**Sup. Fig. S5. Optimization of HPO decomposition assay.** **a.** optimization of *Histoplasma* intracellular protein concentrations (n=4). Concentration of cellular lysates were determined by Bradford assay prior to assay. **b.** optimization of reaction time to determine linearity range using optimized protein concentration (8  $\mu\text{g/ml}$ ).

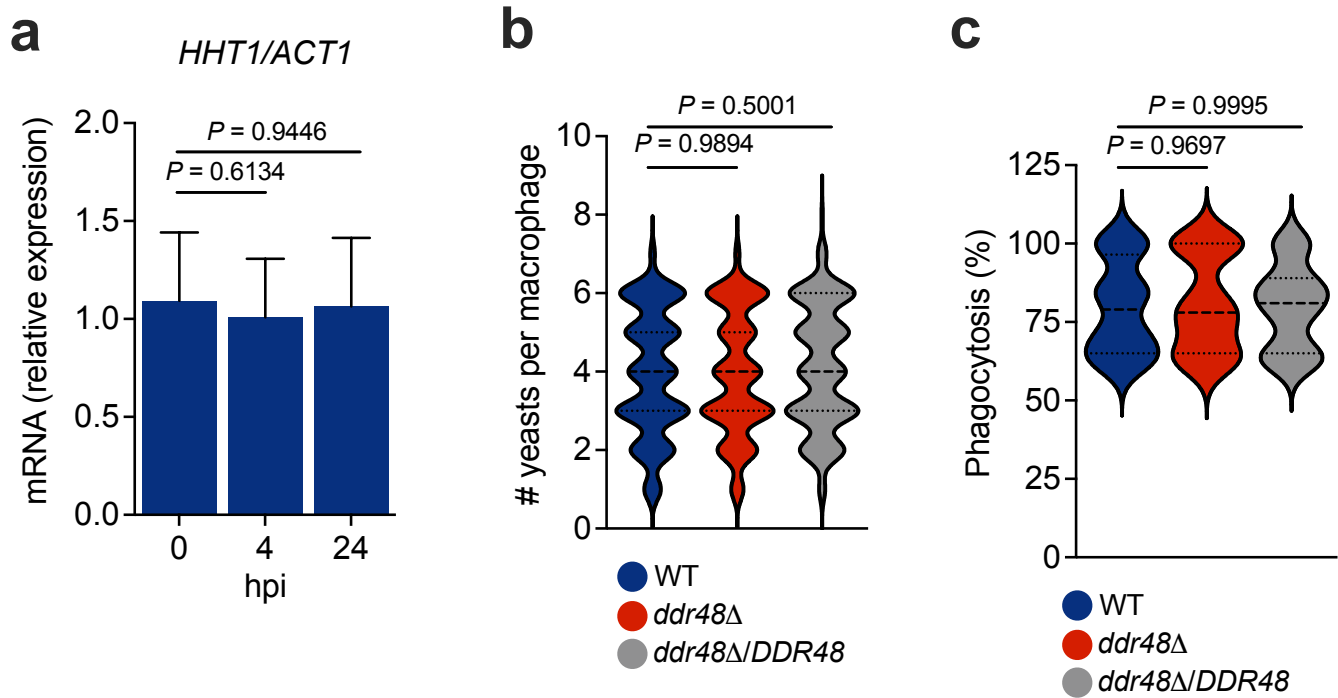

**Sup. Fig. S6. *HHT1* expression levels remain unchanged within macrophages.** **a.** Expression of *HHT1* relative to *ACT1* at 0, 4, and 24 hours post-infection (hpi) with RAW 264.7 macrophages at an MOI = 5:1 measured by qRT-PCR (n = 12). Macrophages were infected with wildtype (WT), *ddr48*Δ, or *ddr48*Δ/*DDR48* yeasts (MOI 5:1) and **b.** the phagocytic index and **c.** phagocytosis rate were determined. All data generated were performed on three technical replicates and at least two biological replicates. Data is represented as mean ± standard deviation (SD). Statistical analyses were performed using 1-way ANOVA with Sidak's multiple comparisons test.

**Supplementary Table S1: Primers used in this study**

| Name                | Sequence Direction <sup>1</sup> (5' to 3') |                                      | Use               |
|---------------------|--------------------------------------------|--------------------------------------|-------------------|
|                     | Forward                                    | Reverse                              |                   |
| CATA                | CCTCCCTATTATCCATCGATTTG                    | ACTGTATCGAACTGCCTTTG                 | qPCR              |
| ACT1                | GATGGTGTGACCCACGTCGTTCCAATC                | CGTTCAGGCGGGGCAATAATCTTAACCTTC       | qPCR              |
| CATB                | CGGTGCTGGACAAATGTT                         | AGACCGTGAGTGAGTTGTA                  | qPCR              |
| CATP                | CCAACTTACACTGACTCCAATG                     | ATGGTGGTGATATCGCTGA                  | qPCR              |
| DDR48               | GACAATACTACCACCTATGGGTCTAA                 | CTTATCAGCGATGGTTTCCTTCTG             | qPCR              |
| ERG1                | GTTTCAGTCATCCATTCGTCAAC                    | CGGAAGCTCTGCGTCTATAAG                | qPCR              |
| ERG11A <sup>2</sup> | TTCTTGGAACAAAAGGCAACG                      | CGAGGTTAGCCCGTATTTGAC                | qPCR              |
| ERG11B <sup>2</sup> | CTATGGAACCGACCCGTATAAG                     | TCGTTGCCCTTTATGCCTAG                 | qPCR              |
| ERG2 <sup>2</sup>   | TTCAGCAACCACGGAAAC                         | CGCCATGCAAGTATCGTAAA                 | qPCR              |
| ERG24               | CCTTCTACTCTTGTGCTTGATAC                    | AGTGGTAAGAAAGGTGTTGAAT               | qPCR              |
| ERG25 <sup>2</sup>  | GCAATAAAATCCCTAGCCTGAAG                    | TTTGATAAGTCATAGTCCACGGG              | qPCR              |
| ERG26               | TATACAGAGACGAAGGCCAA                       | GAGGACGAATGGAGAGGATTG                | qPCR              |
| ERG27               | GGAGGAAGATTGGTCCTATTG                      | ACTTTGACTGCCTGTGTAATG                | qPCR              |
| ERG3 <sup>2</sup>   | GGATTATGCCAAGCCCTTAC                       | CAGGACAGTCCAGATGTTAATG               | qPCR              |
| ERG4                | GTACATCGTCTATCTGTTTGTTC                    | GCATATCCATACCACCCATC                 | qPCR              |
| ERG5                | CCACCATCTTCACCATCTTG                       | CGACGAAGTGTGGAAGAC                   | qPCR              |
| ERG6                | CTCTTACGCGACATTACTACAA                     | CCACAGCCTACATCAAGAAC                 | qPCR              |
| ERG7                | GGCACCTGTATGAACTACAC                       | GGAAGCAACCAGAGTTCAG                  | qPCR              |
| GPD3                | CATGCAAAACCGAGAAACCC                       | CCCACTCATTGTCGTACCAG                 | qPCR              |
| GPX1                | CTTCAGTGCCTCCAGTAATAG                      | GGACAACCTTGCCTTTGAGA                 | qPCR              |
| GSH1                | GGAGAGAAGCCGCTGAAGAATGATCGC                | GATGAAGAGGTGGGCGAAGTGCG              | qPCR              |
| GSH2                | GGTTGGGGAAGATTATTGAAGAACTCAAGGAC           | ATGAGGAGGAGATGGTGTTAAATTCCAATTGTT    | qPCR              |
| HHT1                | TGGTAAGGTCCCTCGTAAGC                       | GGAGTTTGCGGATGAGGAG                  | qPCR              |
| PFK1                | GATTTGTGATTGAAGTGATGGGACGACATTGCG          | GCGTTTGCCCTCGTTTTCGATTCTGAGTGATAATTC | qPCR              |
| SOD1                | CTTGTGGCGTCATTGGTATCACCACG                 | CCTCTCCTTCACAACTAAAGCACAGGTG         | qPCR              |
| SOD3                | GGTTCTTTGACCCTGCAATAA                      | GTTACGTTAGGTGGGTTGTTAG               | qPCR              |
| SRB1 <sup>2</sup>   | GTAGCAGCCGAACAACATCTG                      | AATGAGACCTTGGGCGATACG                | qPCR              |
| TEF1                | GCTCTGCTTGCTTTACCCCTTG                     | TCTCCTTGTTCCAGCCCTTG                 | qPCR              |
| TRR1                | GATTACAAGTGCGGGATCTG                       | CCCATGTTACACATCTATCTTCTC             | qPCR              |
| TRX1                | GACTCCATCGTCCAAACCA                        | GAAGGAGGTGCGGTCTTT                   | qPCR              |
| ddr48-5'            | GAGTCTCTCAATTGGATCCTTAATCAAGCGG            | CTTCTCGCGTTCTGGAGGTGATCTTACTCC       | PCR <i>ddr48Δ</i> |
| ddr48-3'            | CTTCCAGATCCATCGCTGATAAGGTAATGGGTAAAGTTG    | CATACTTTGAAGAAATGGACGCACGAAGC        | PCR <i>ddr48Δ</i> |
| hph1                | CCTCCAGAACGCCGAGAAGAACTGGAGGGGT            | ATCTGGAAGAGGTAAACCCGAAAAC            | PCR <i>ddr48Δ</i> |
| nest1               | AAGATATCCATCGCTGATATGCTTTTCCAGCTATTGAC     | AAGATATCCACCTGGGCCCTCCTCTCCCTCCC     | PCR <i>ddr48Δ</i> |
| ddr48-probe         | GATAGTTATGGCTCCTCCAACC                     | GAGTCGCTCCTATCTCCATACT               | PCR probe         |
| hht1-probe          | GAGTCGCTCCTATCTCCATACT                     | AACAGCGCCAGTCATCTAAG                 | PCR probe         |

<sup>1</sup> Direction relative to mRNA transcript

<sup>2</sup> Sequences derived from DuBois & Smulian 2016.

DuBois, J.C.; Smulian, A.G. Sterol regulatory element binding protein (Srb1) is required for hypoxic adaptation and virulence in the dimorphic fungus *Histoplasma capsulatum*. *PLoS One* **2016**, *11*, e0163849



# **Supplemental – Full Blots**

**jof-1437875 – Blancett et. Al.**

# Figure 1

*DDR48* →  
*HHT1* →

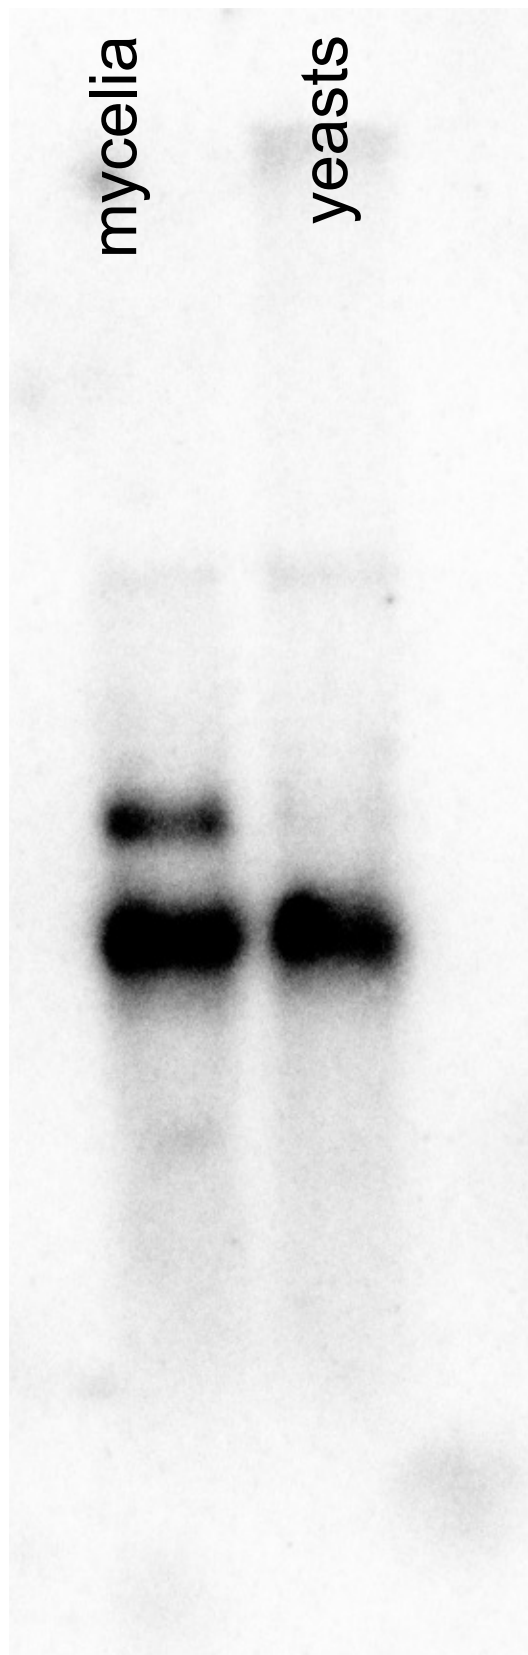

**Figure S2**

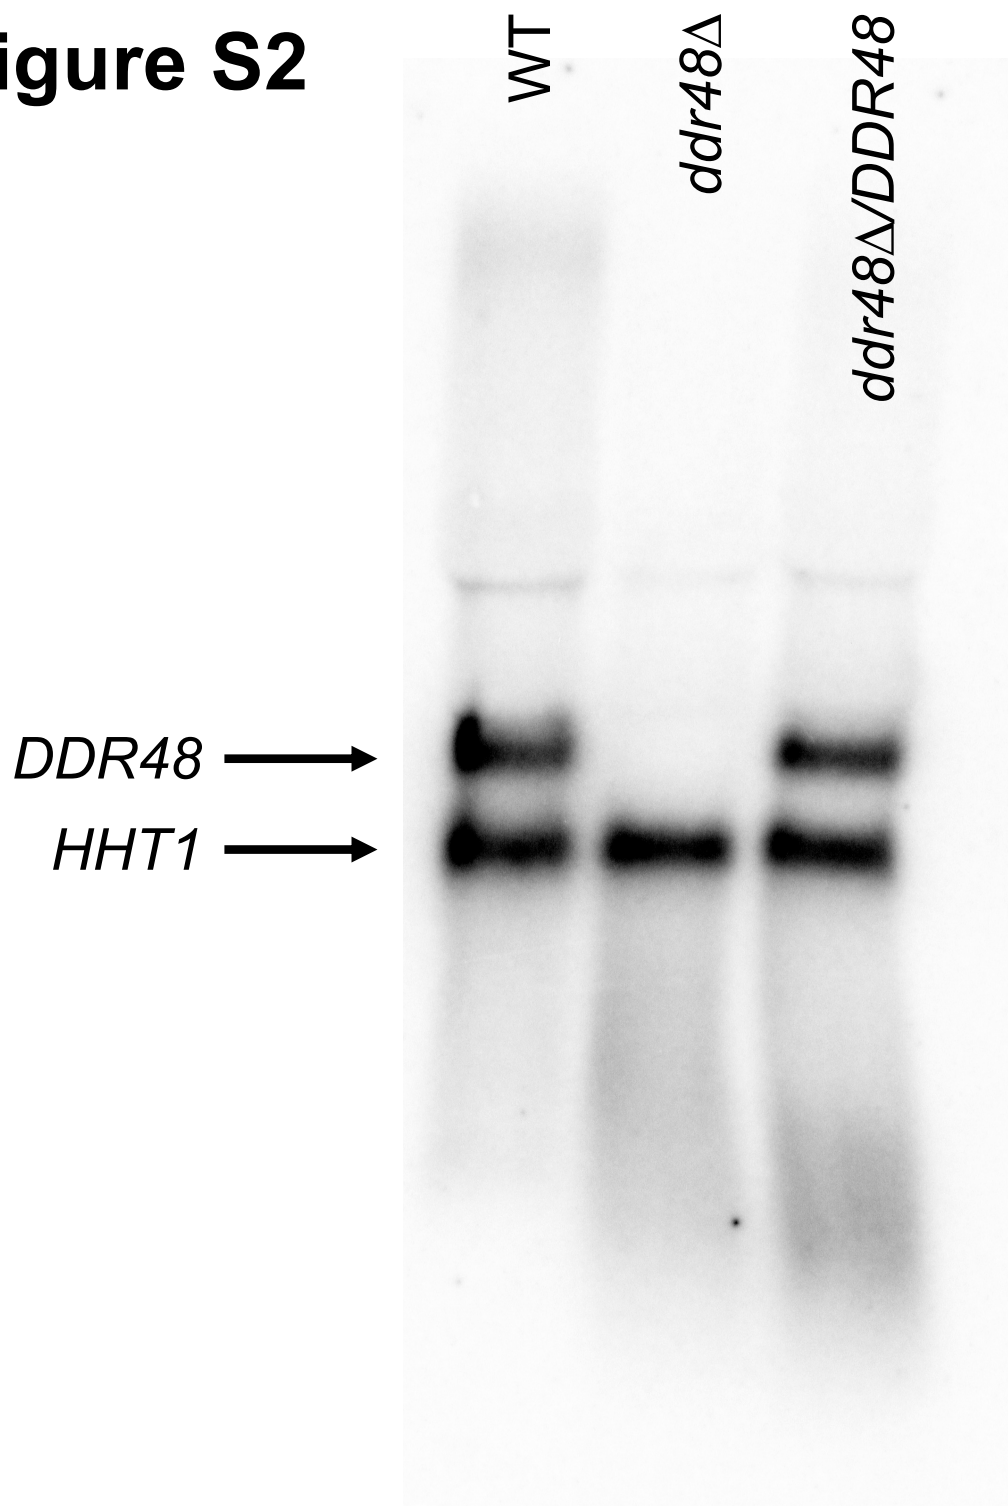

Supplement: s1 [file s1]
